# Supplementary material
Source: publisher figshare collection journal article supplement (https://springernature.figshare.com/ndownloader/files/21875808)
Supplement: Supplementary file 1 [file 21875808]

## Sheet: Sheet1
date	Confirmed case	Suspected case	Cured case	Death case	New confirmed cases	New suspected cases	New cured cases	New deaths
Jan 20th，2020	291	54	0	6	0	0	0	0
	440	136	0	9	149	26	0	3
	571	393	0	17	131	257	0	8
	830	1072	34	25	259	680	6	8
	1287	1965	38	41	444	1118	3	16
Jan 25th，2020	1975	2684	49	56	688	1309	11	15
	2744	5794	51	80	769	3806	2	24
	4515	6973	60	106	1771	2077	9	26
	5974	9239	103	132	1459	3248	43	26
	7711	12167	124	170	1737	4148	21	38
Jan 30th，2020	9692	15238	171	213	1982	4812	47	43
	11791	17988	243	259	2102	5019	72	46
	14380	19544	328	304	2590	4562	85	45
	17205	21558	475	361	2829	5173	147	57
	20438	23124	632	425	3235	5072	157	64
	24324	23260	892	490	3887	3971	262	65
Feb 5th,2020	28018	24702	1153	563	3694	5328	261	73
	31161	26359	1540	636	3143	4833	387	73
	34546	27657	2050	722	3899	4214	510	86
	37198	28942	2649	811	2656	3916	600	89
	35982	23589	3281	908	3062	4008	632	97
Feb 10th,2020	42638	21675	3996	1016	2478	3536	716	108
	44653	16067	4740	1113	2015	3342	744	97
	59804	13435	5911	1367	15152	2807	1171	254
	63851	10109	6723	1380	5090	2450	1081	121
	66492	8969	8096	1523	2641	2277	1373	143
Feb 15th,2020	68500	8228	9419	1665	2009	1918	1323	142
	70548	7264	10844	1770	2048	1563	1425	105
	72436	6242	12552	1868	1886	1432	1701	98
	74185	5248	14376	2004	1749	1185	1824	136
	74576	4922	16155	2118	394	1277	1779	114
Feb 20th,2020	74465	5206	18264	2236	889	1614	2109	118
	76288	5365	20659	2345	397	1361	2393	109
